# Supplementary material for: Terapia Racional Emotiva y Conductual en delincuentes masculinos adultos
Source: Royal Society of Chemistry journal article supplement (doi:10.1039/c3dt51580j), 2009-01-01

## Supporting Information

### New Ru(II) Complexes Containing dmsO and pyrazolyl Ligands as Catalysts for Nitrile Hydration in environmentally friendly media

Íngrid Ferrer,<sup>a</sup> Jordi Rich,<sup>a</sup> Xavier Fontrodona,<sup>a</sup> Montserrat Rodríguez,<sup>a\*</sup> and Isabel Romero,<sup>a\*</sup>

<sup>a</sup>Departament de Química i Serveis Tècnics de Recerca, Universitat de Girona, Campus de Montilivi, E-17071 Girona, Spain.

Keywords: catalysis / Hydration / Ruthenium complexes / dmsO complexes / Pyrazolyl ligands / recyclability.

## Table of Contents

**Table S1.** Crystallographic Data for Complex **2**

**Table S2.** Selected Bond Lengths (Å) and Angles (°) for Complex **2**

**Table S3.** Crystallographic Data for Complex **3**

**Table S4.** Selected Bond Lengths (Å) and Angles (°) for Complex **3**

**Figure S1.** ATR FTIR spectra of **2** and **3**

**Figure S2.** NMR spectra of **2**, 300 MHz, CD<sub>2</sub>Cl<sub>2</sub>: a) <sup>1</sup>H-NMR; b) <sup>13</sup>C-NMR; c) COSY; d) NOESY; e) <sup>1</sup>H-<sup>13</sup>C HMBC, f) <sup>1</sup>H-<sup>13</sup>C HSQC

**Figure S3.** NMR spectra of **3**, 300 MHz, CD<sub>2</sub>Cl<sub>2</sub>: a) <sup>1</sup>H-NMR; b) <sup>13</sup>C-NMR; c) COSY; d) NOESY; e) <sup>1</sup>H-<sup>13</sup>C HMBC, f) <sup>1</sup>H-<sup>13</sup>C HSQC

**Figure S4.** UV-visible spectroscopy of 0.7mM of **2** and **3** in CH<sub>3</sub>CN

**Figure S5.** <sup>1</sup>H-NMR spectra in CD<sub>3</sub>CN corresponding to the photochemical reaction of complex **2** into **4**

**Figure S6.** CV of **3** in CH<sub>3</sub>CN

**Figure S7.** Final UV-vis spectra obtained after hydrolysis of complex **2** under visible light irradiation and upon warming up to 60°C

**Table S1.** Crystallographic Data for Complex **2**.

| 2                                        |                                                                                                              |
|------------------------------------------|--------------------------------------------------------------------------------------------------------------|
| Empirical formula                        | C <sub>24</sub> H <sub>40</sub> Cl <sub>4</sub> N <sub>6</sub> O <sub>5</sub> Ru <sub>2</sub> S <sub>4</sub> |
| Formula weight                           | 964.80                                                                                                       |
| Crystal system                           | Monoclinic                                                                                                   |
| Space group                              | C2/c                                                                                                         |
| a [Å]                                    | 24.7647(10)                                                                                                  |
| b [Å]                                    | 11.7498(5)                                                                                                   |
| c [Å]                                    | 14.0980(5)                                                                                                   |
| α [°]                                    | 90                                                                                                           |
| β [°]                                    | 116.3070(10)                                                                                                 |
| γ [°]                                    | 90                                                                                                           |
| V [Å <sup>3</sup> ]                      | 3677.4(3)                                                                                                    |
| Formula Units/ cell                      | 4                                                                                                            |
| Temp. [K]                                | 300(2)                                                                                                       |
| ρ <sub>calc</sub> , [Mg/m <sup>3</sup> ] | 1.743                                                                                                        |
| μ [mm <sup>-1</sup> ]                    | 1.382                                                                                                        |
| Final R indices,<br>[I>2σ(I)]            | R1=0.0224<br>wR2 = 0.0663                                                                                    |
| R indices [all data]                     | R1=0.0243<br>wR2 = 0.0675                                                                                    |

$$R_1 = \frac{\sum ||F_o| - |F_c||}{\sum |F_o|}$$

$$wR_2 = \left[ \frac{\sum \{w(F_o^2 - F_c^2)^2\}}{\sum \{w(F_o^2)^2\}} \right]^{1/2}, \text{ where } w = 1/[\sigma^2(F_o^2) + (0.0042P)^2] \text{ and } P = (F_o^2 + 2F_c^2)$$

**Table S2.** Selected Bond Lengths (Å) and Angles (°) for Complex **2**.

|                   |             |
|-------------------|-------------|
| Ru(1)-N(3)        | 2.0313(15)  |
| Ru(1)-N(1)        | 2.1237(15)  |
| Ru(1)-S(2)        | 2.2432(5)   |
| Ru(1)-S(1)        | 2.2558(5)   |
| Ru(1)-Cl(1)       | 2.4103(5)   |
| Ru(1)-Cl(2)       | 2.4277(5)   |
|                   |             |
| N(3)-Ru(1)-N(1)   | 76.92(6)    |
| N(3)-Ru(1)-S(2)   | 90.03(4)    |
| N(1)-Ru(1)-S(2)   | 92.89(4)    |
| N(3)-Ru(1)-S(1)   | 96.74(4)    |
| N(1)-Ru(1)-S(1)   | 171.61(5)   |
| S(2)-Ru(1)-S(1)   | 92.595(19)  |
| N(3)-Ru(1)-Cl(1)  | 171.27(4)   |
| N(1)-Ru(1)-Cl(1)  | 94.66(4)    |
| S(2)-Ru(1)-Cl(1)  | 92.735(19)  |
| S(1)-Ru(1)-Cl(1)  | 91.413(19)  |
| N(3)-Ru(1)-Cl(2)  | 86.95(4)    |
| N(1)-Ru(1)-Cl(2)  | 83.49(4)    |
| S(2)-Ru(1)-Cl(2)  | 175.728(18) |
| S(1)-Ru(1)-Cl(2)  | 90.75(2)    |
| Cl(1)-Ru(1)-Cl(2) | 89.83(2)    |

**Table S3.** Selected Bond Lengths (Å) and Angles (°) for Complex **3**.

| <b>3</b>                                  |                                                                                               |
|-------------------------------------------|-----------------------------------------------------------------------------------------------|
| Empirical formula                         | C <sub>9</sub> H <sub>22</sub> Cl <sub>2</sub> N <sub>2</sub> O <sub>3</sub> RuS <sub>3</sub> |
| Formula weight                            | 474.44                                                                                        |
| Crystal system                            | Monoclinic                                                                                    |
| Space group                               | P21                                                                                           |
| a [Å]                                     | 8.531(7)                                                                                      |
| b [Å]                                     | 13.122(11)                                                                                    |
| c [Å]                                     | 8.953(8)                                                                                      |
| α [°]                                     | 90                                                                                            |
| β [°]                                     | 116.997(13)                                                                                   |
| γ [°]                                     | 90                                                                                            |
| V [Å <sup>3</sup> ]                       | 893.1(13)                                                                                     |
| Formula Units/ cell                       | 4                                                                                             |
| Temp, [K]                                 | 300(2)                                                                                        |
| ρ <sub>calc</sub> , [Mg/m <sup>-3</sup> ] | 1.764                                                                                         |
| μ [mm <sup>-1</sup> ]                     | 1.533                                                                                         |
| Final R indices,<br>[I>2σ(I)]             | R1=0.0521<br>wR2 = 0.1475                                                                     |
| R indices [all data]                      | R1=0.0729<br>wR2 = 0.2150                                                                     |

$$R_1 = \frac{\sum ||F_o| - |F_c||}{\sum |F_o|}$$

$$wR_2 = \left[ \frac{\sum \{w(F_o^2 - F_c^2)^2\}}{\sum \{w(F_o^2)\}} \right]^{1/2}, \text{ where } w = 1/[\sigma^2(F_o^2) + (0.0042P)^2] \text{ and } P = (F_o^2 + 2F_c^2)$$

**Table S4.** Selected Bond Lengths (Å) and Angles (°) for Complex **3**.

|                   |            |
|-------------------|------------|
| Ru(1)-N(1)        | 2.145(9)   |
| Ru(1)-S(1)        | 2.295(3)   |
| Ru(1)-S(2)        | 2.309(3)   |
| Ru(1)-S(3)        | 2.316(4)   |
| Ru(1)-Cl(1)       | 2.429(4)   |
| Ru(1)-Cl(2)       | 2.447(3)   |
|                   |            |
| N(1)-Ru(1)-S(1)   | 94.4(3)    |
| N(1)-Ru(1)-S(2)   | 89.8(3)    |
| S(1)-Ru(1)-S(2)   | 91.51(13)  |
| N(1)-Ru(1)-S(3)   | 170.6(3)   |
| S(1)-Ru(1)-S(3)   | 92.16(14)  |
| S(2)-Ru(1)-S(3)   | 96.78(14)  |
| N(1)-Ru(1)-Cl(1)  | 84.4(3)    |
| S(1)-Ru(1)-Cl(1)  | 89.39(12)  |
| S(2)-Ru(1)-Cl(1)  | 174.14(14) |
| S(3)-Ru(1)-Cl(1)  | 88.97(13)  |
| N(1)-Ru(1)-Cl(2)  | 87.6(3)    |
| S(1)-Ru(1)-Cl(2)  | 176.63(14) |
| S(2)-Ru(1)-Cl(2)  | 91.24(12)  |
| S(3)-Ru(1)-Cl(2)  | 85.57(14)  |
| Cl(1)-Ru(1)-Cl(2) | 88.08(13)  |

Figure S1.

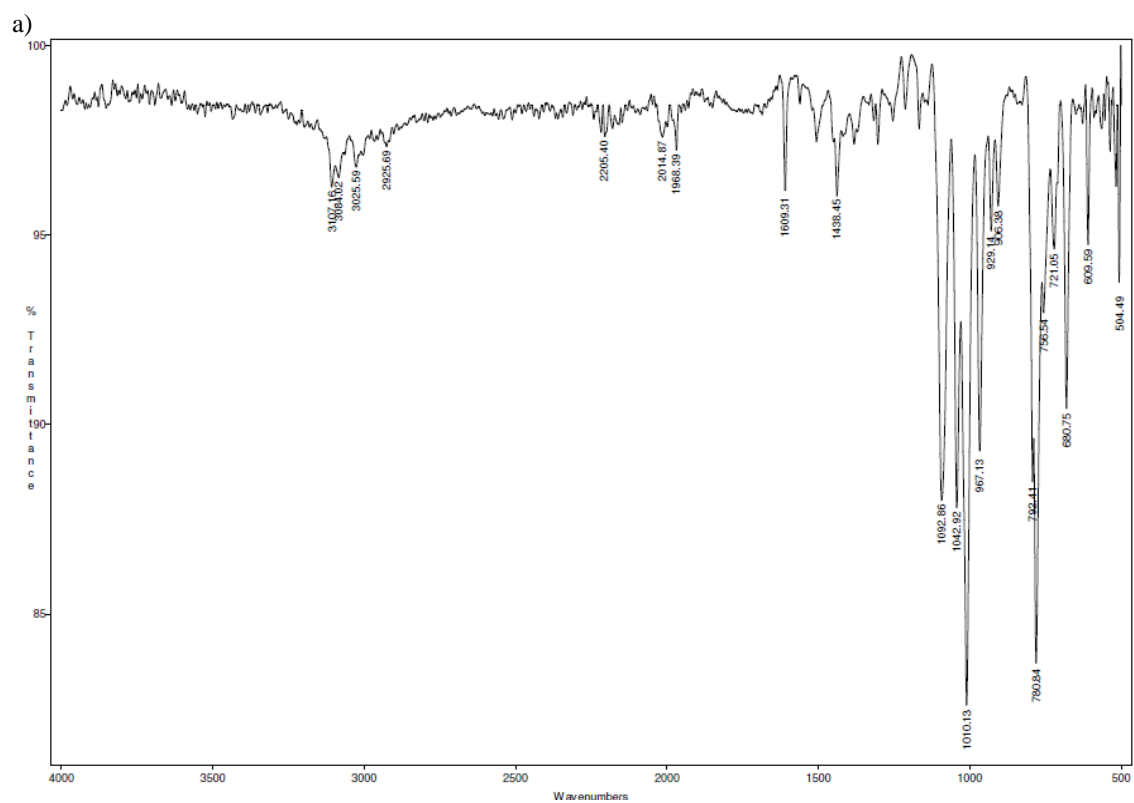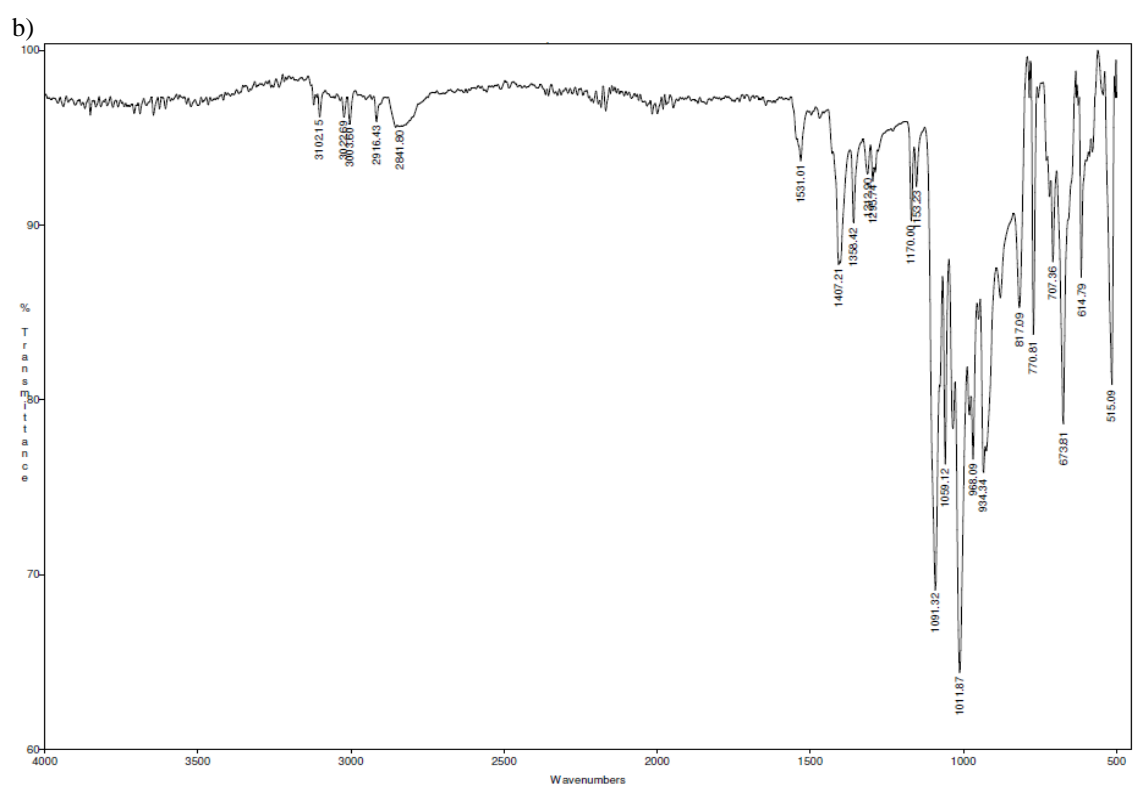

**Figure S2.**

a)

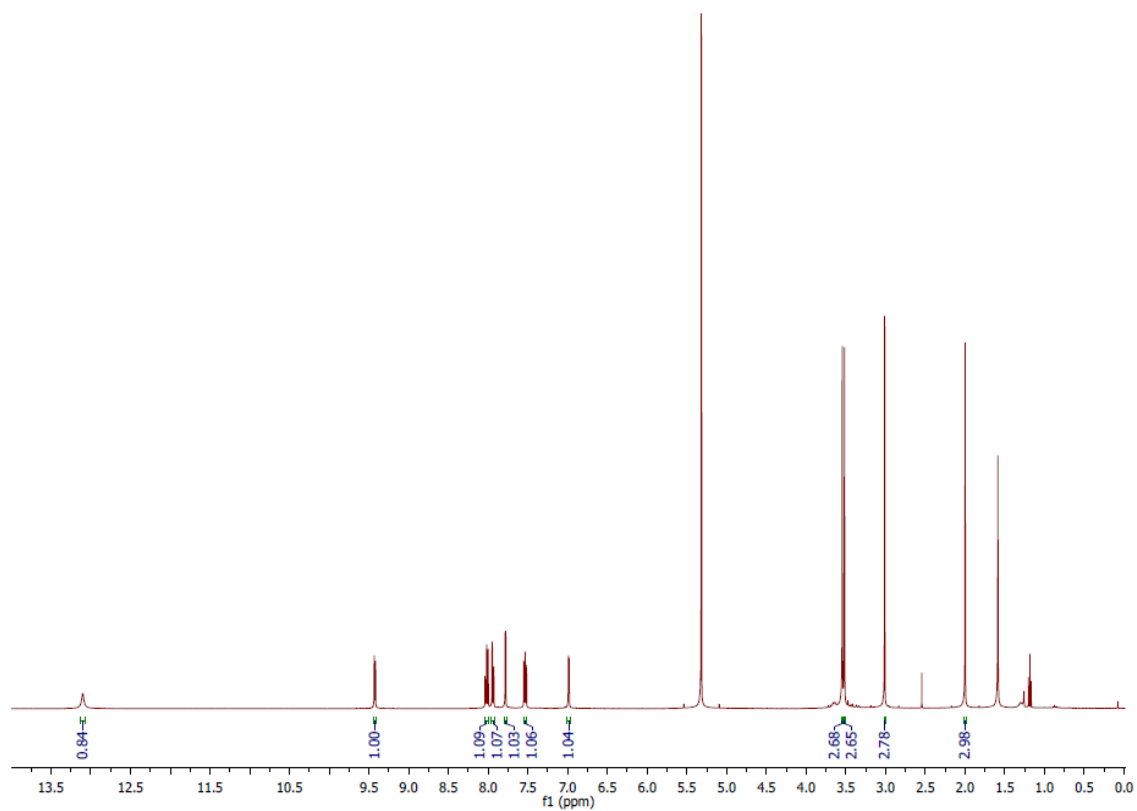

b)

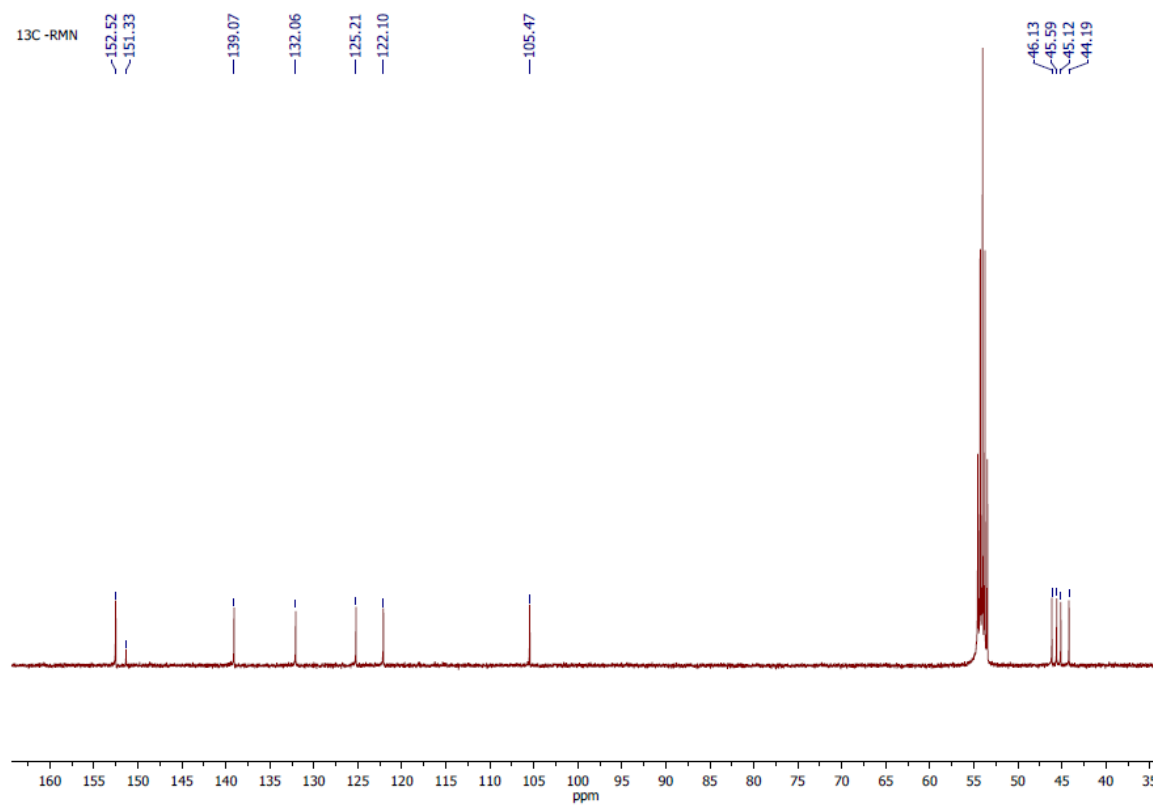

c)

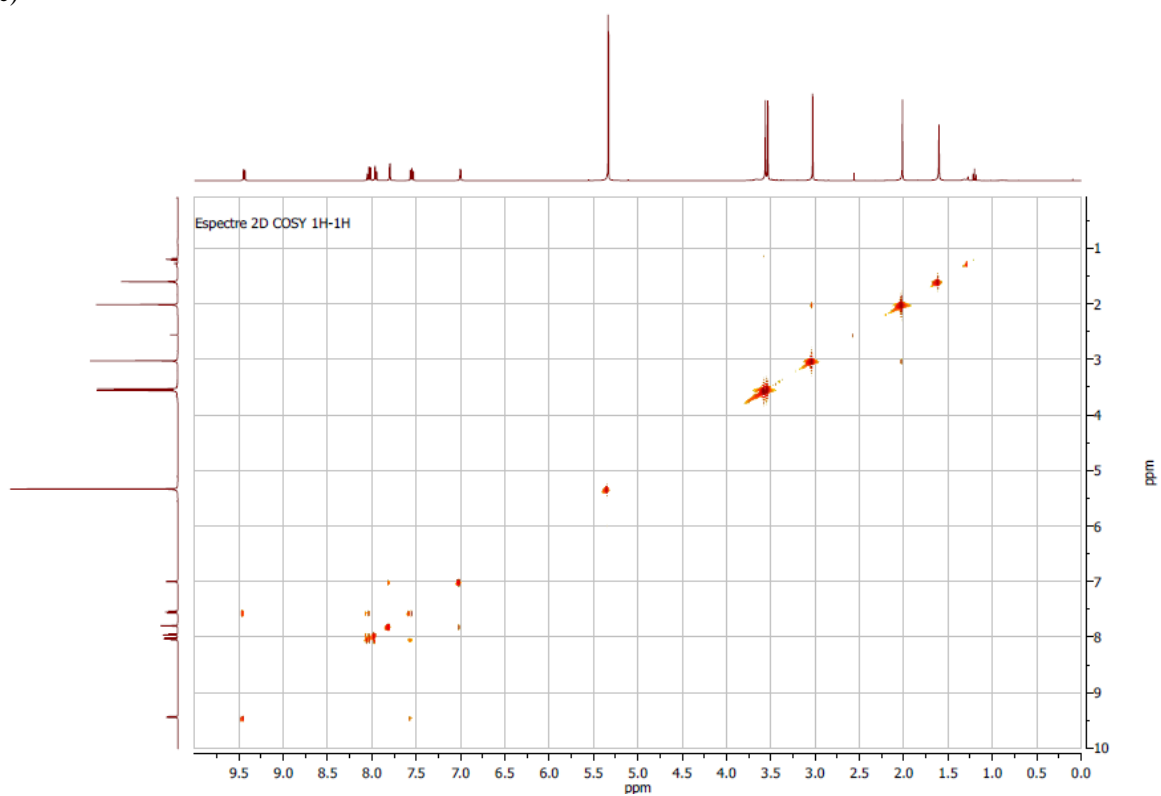

d)

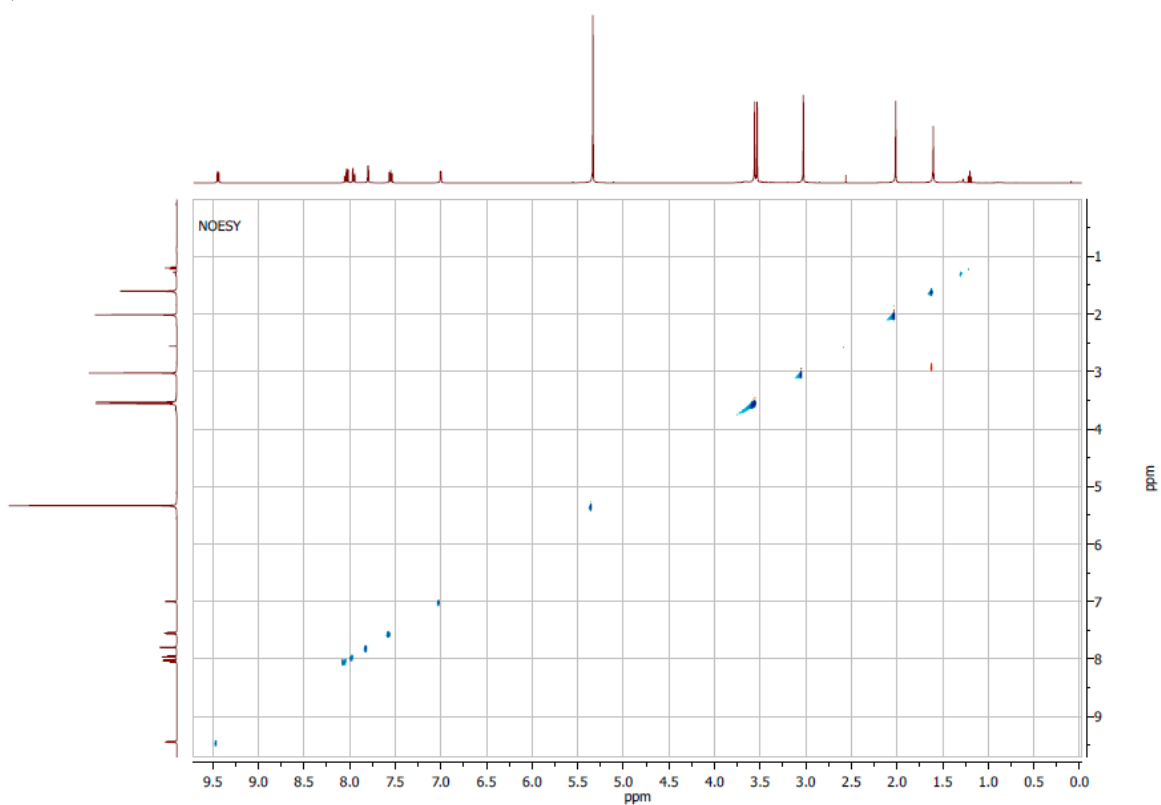



e)

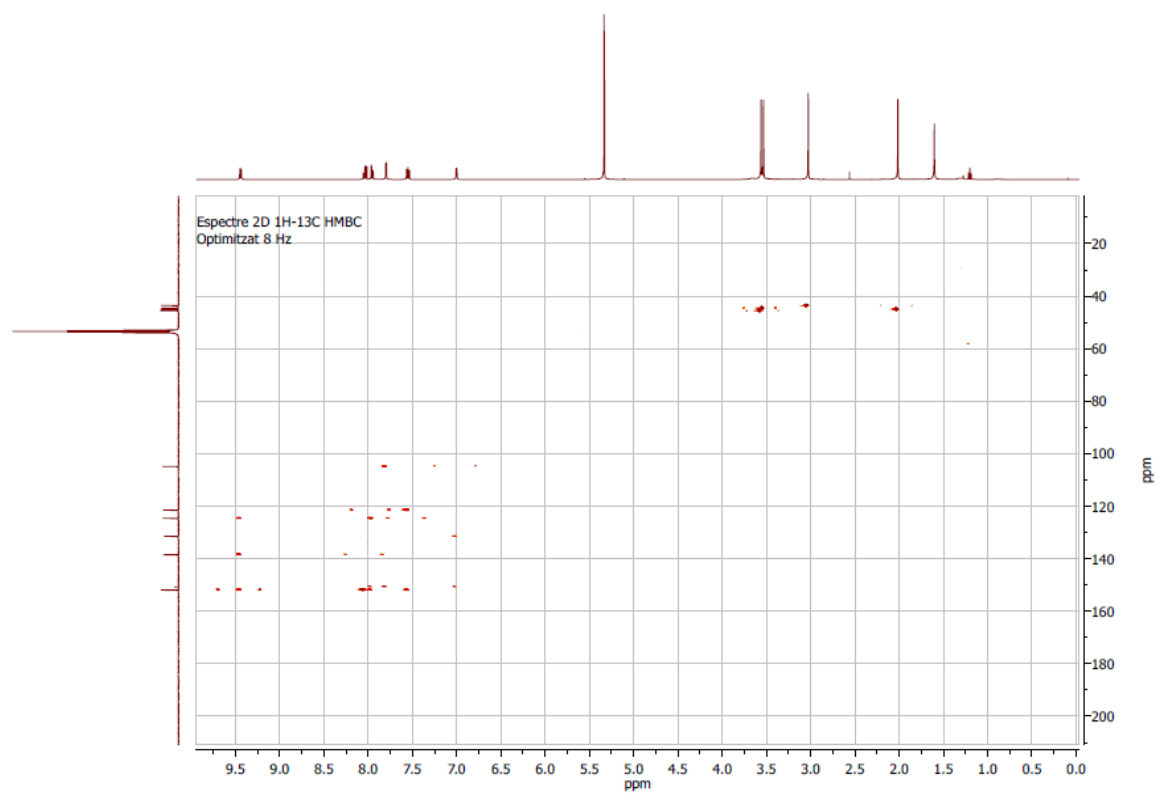

f)

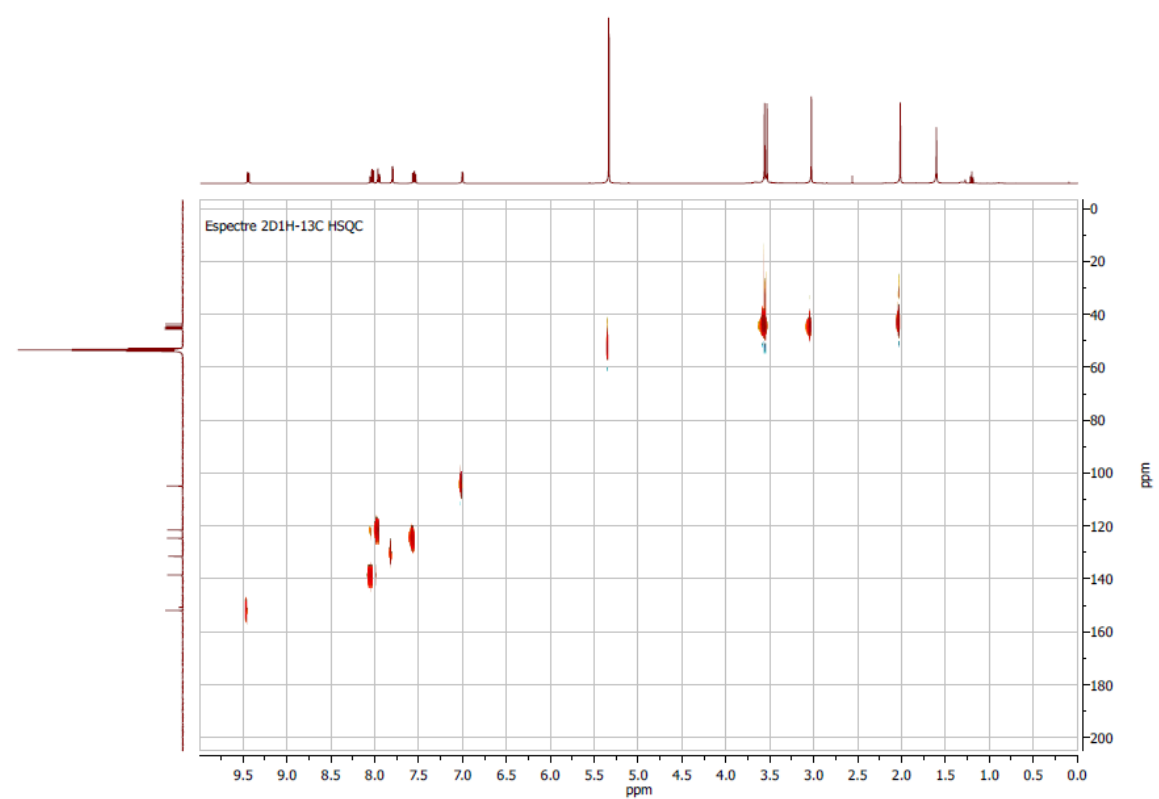

**Figure S3.**

a)

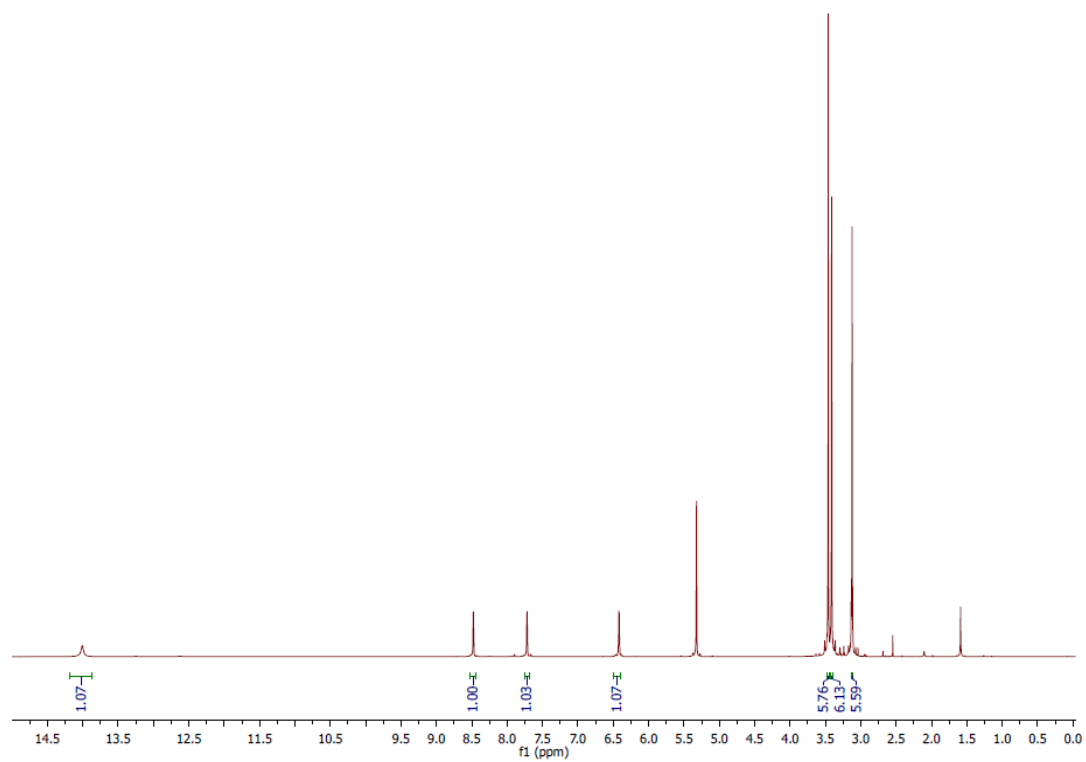

b)

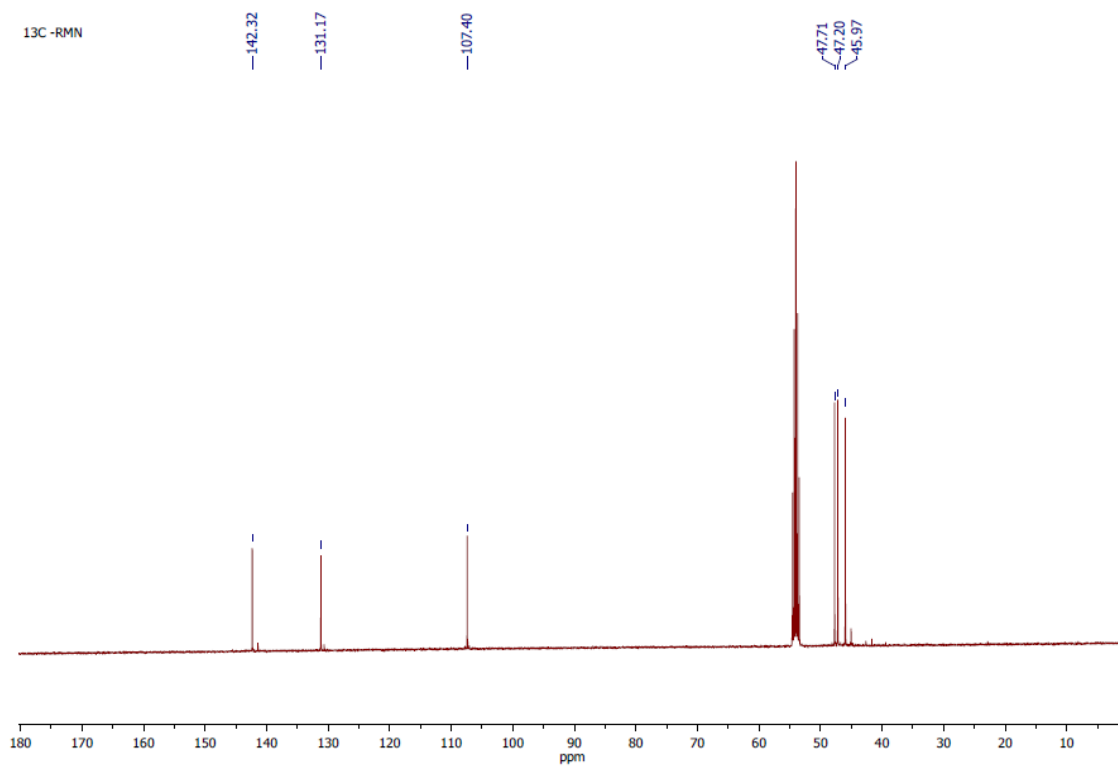

c)

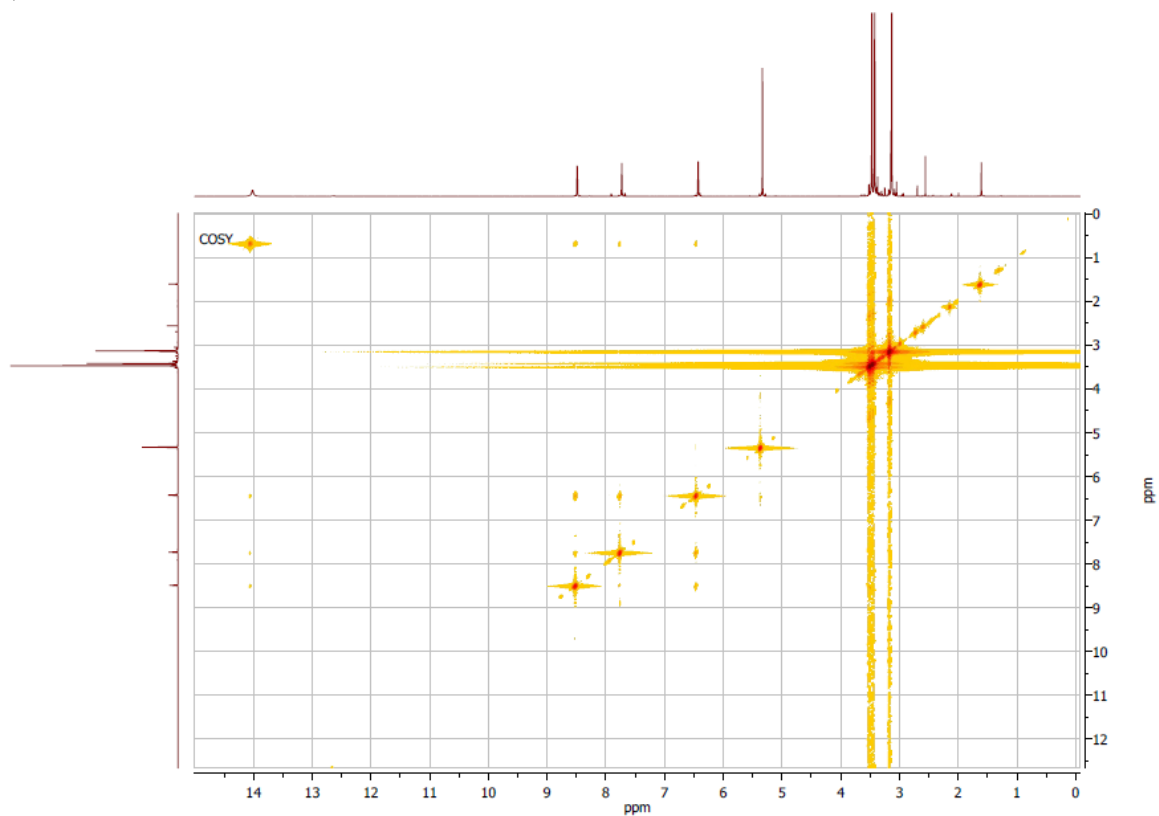

d)

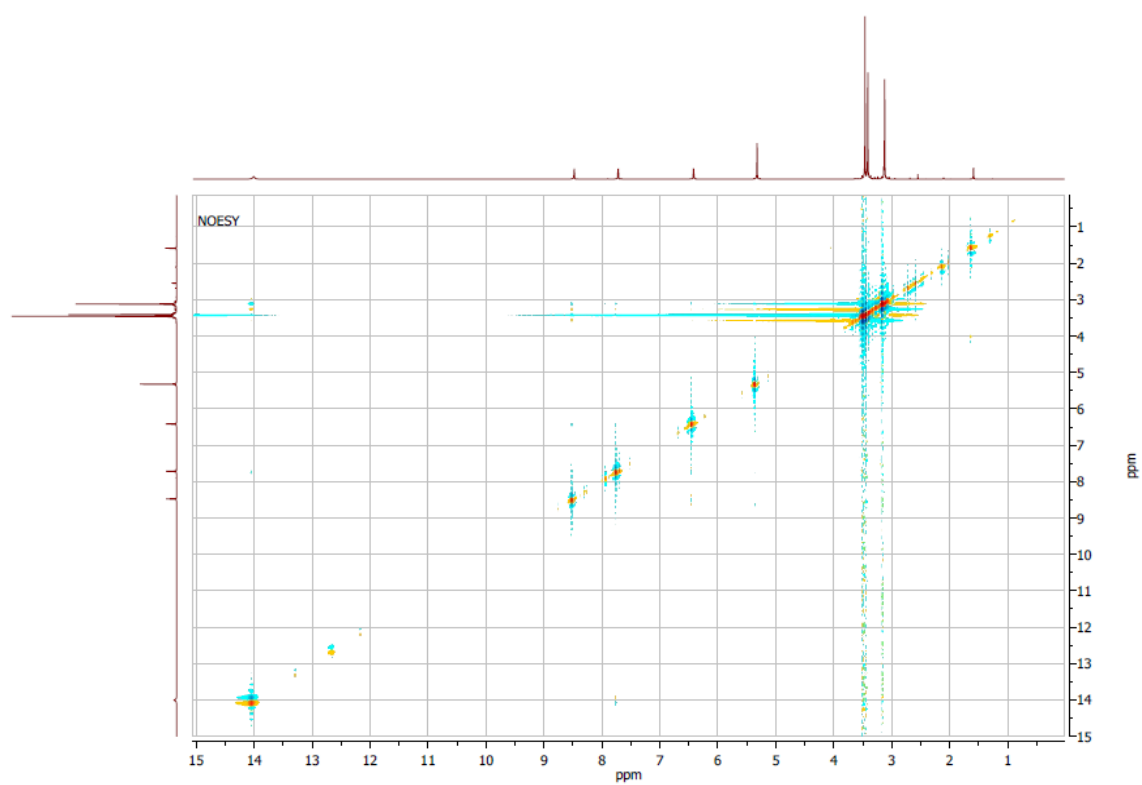

e)

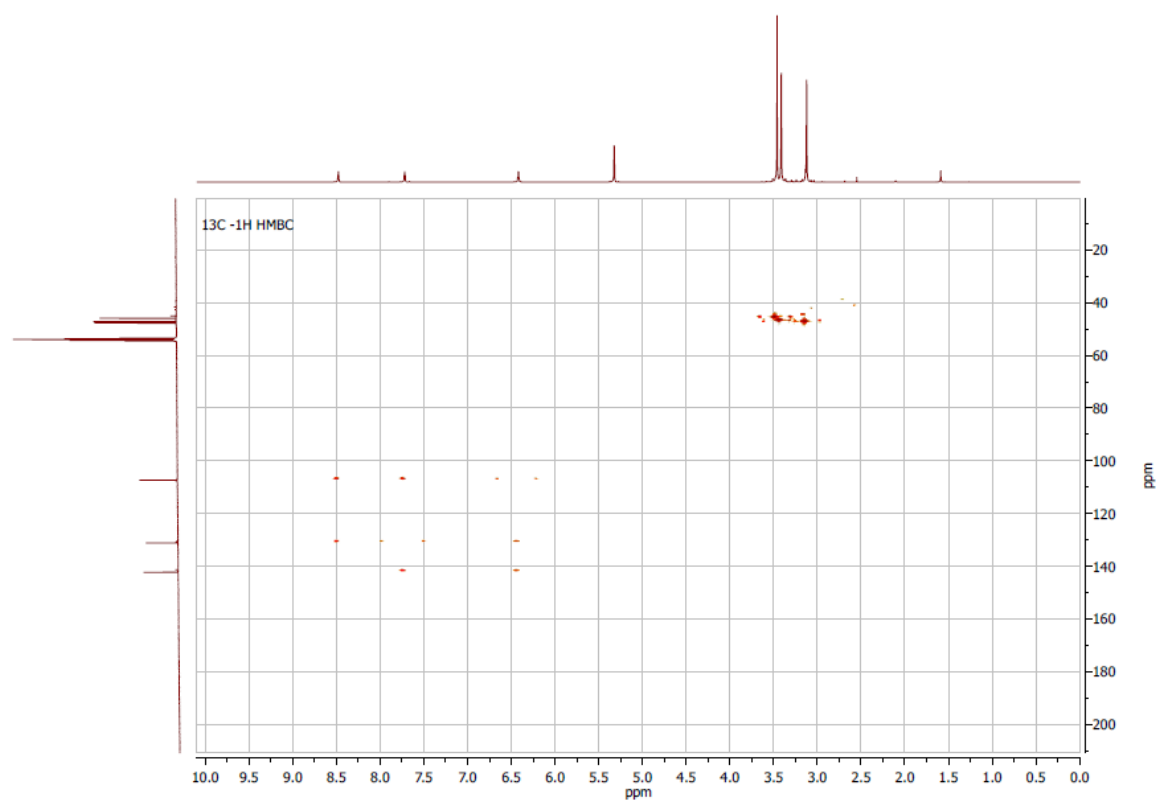

f)

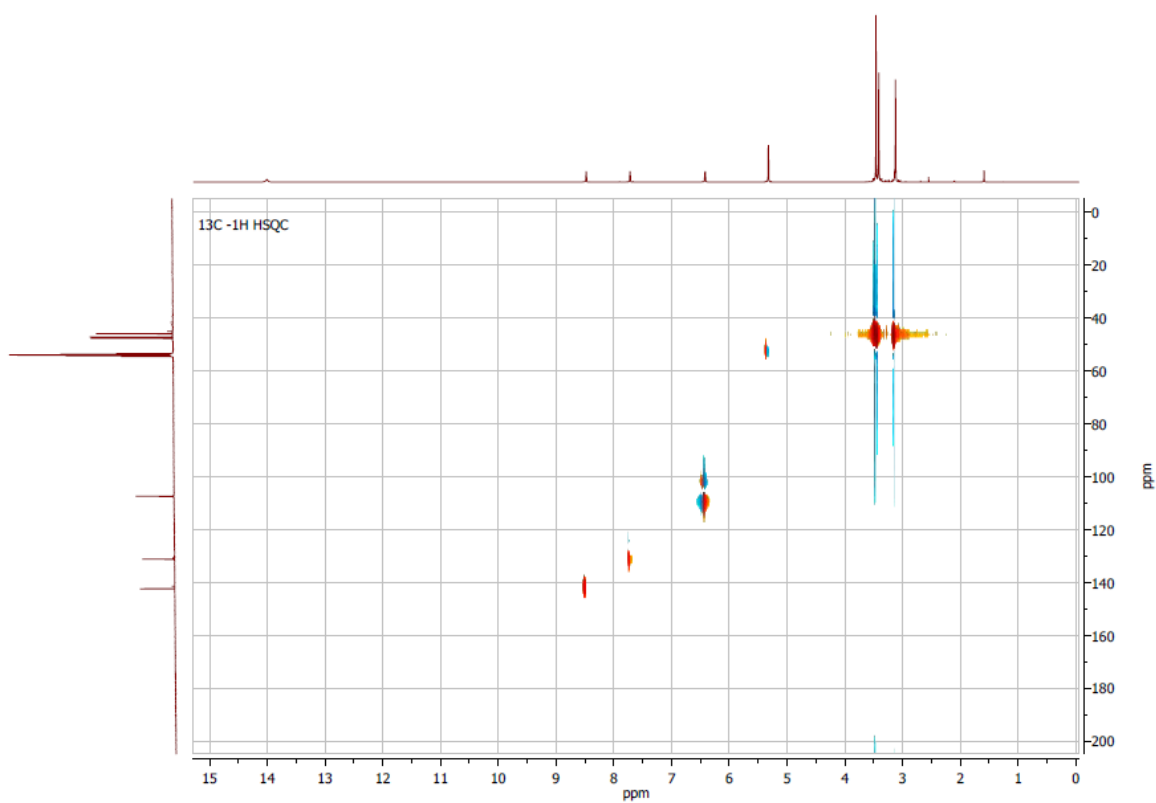

**Figure S4.**

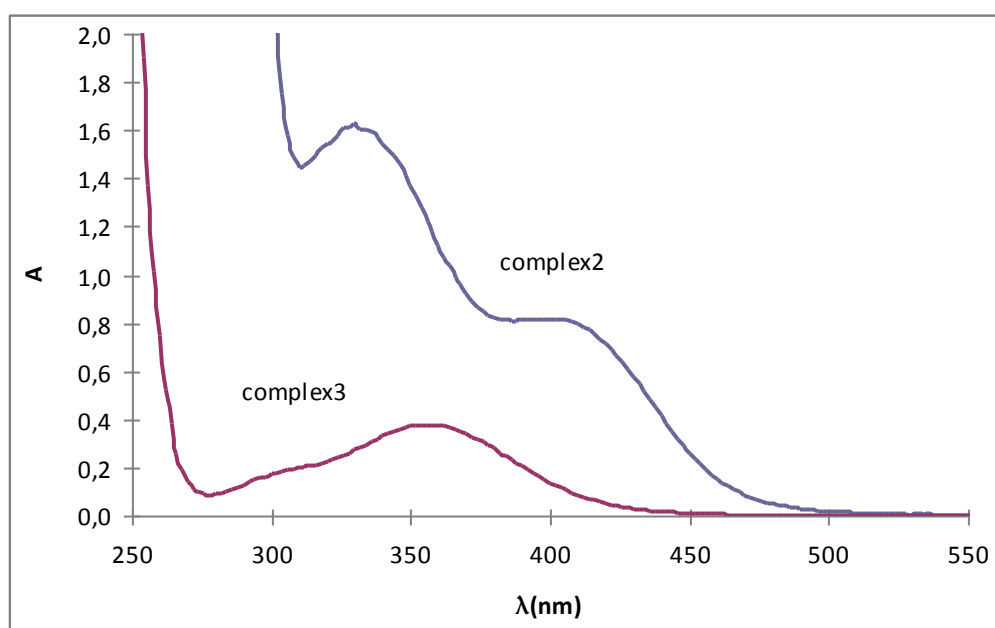

**Figure S5.**

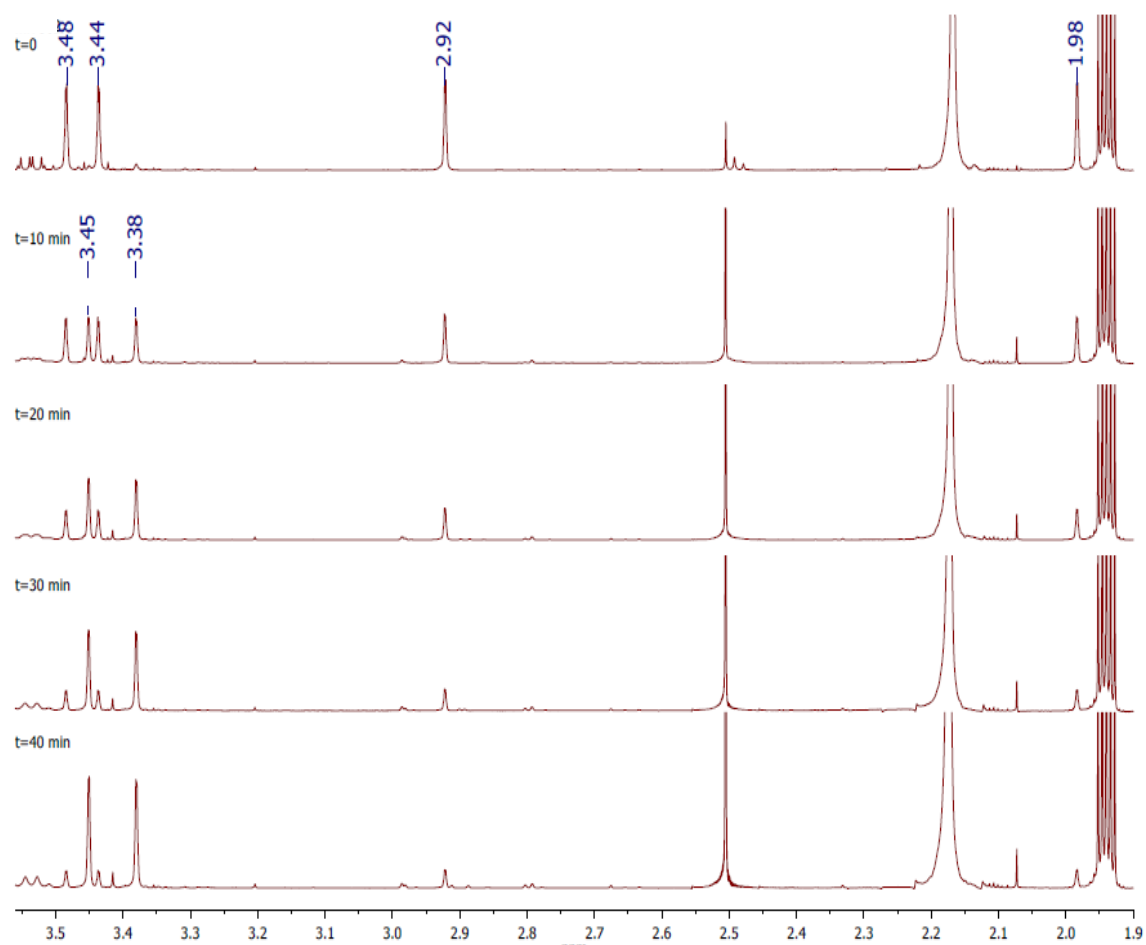

**Figure S6.**

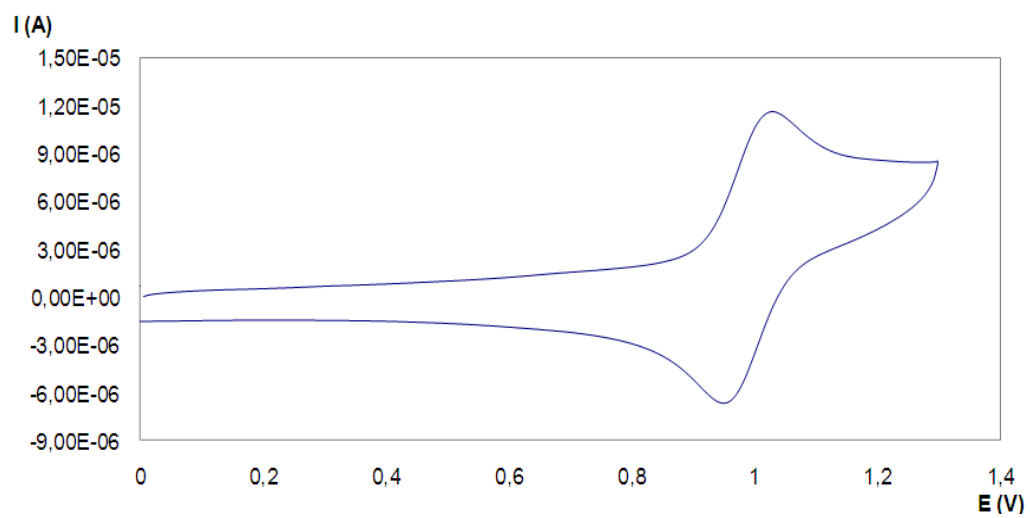

**Figure S7.**

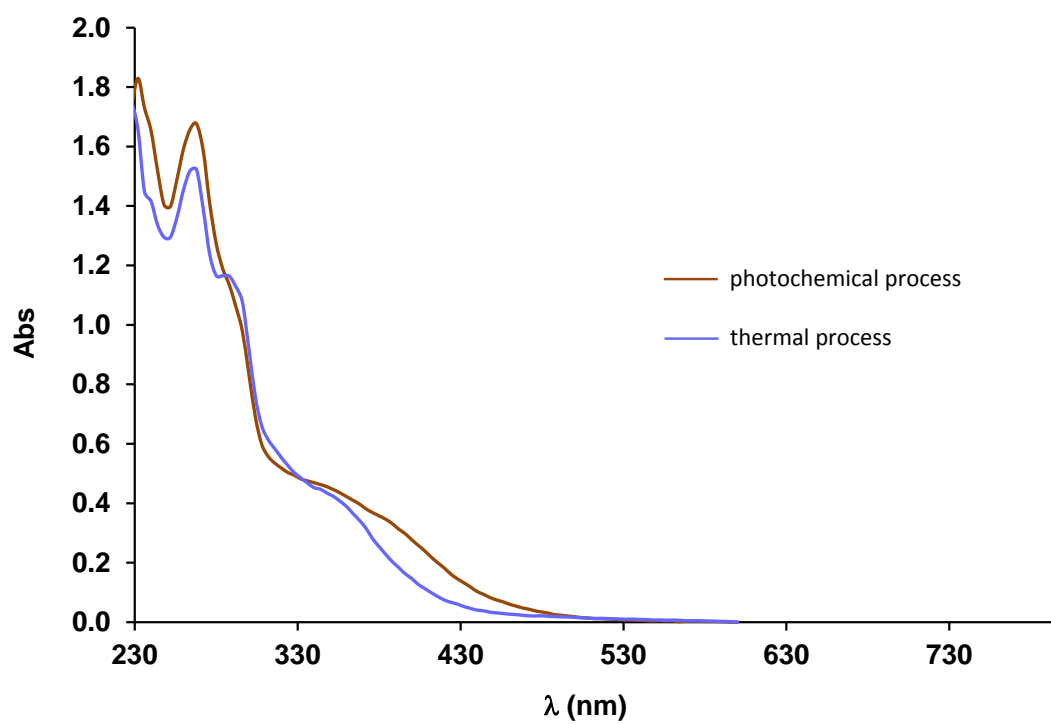

Supplement: c3dt51580j.pdf [file c3dt51580j.pdf]
